# Supplementary material
Source: HighWire-hosted journal article supplement (https://bmjopen.bmj.com/content/13/3/e070388)
Supplement: inline-supplementary-material-1 [file inline-supplementary-material-1.pdf]

**Supplemental Figure 1.** Child mortality rates by year, Agincourt Health and Demographic Surveillance System (AHDSS) and Africa Health Research Institute (AHRI), South Africa 2000-2015.

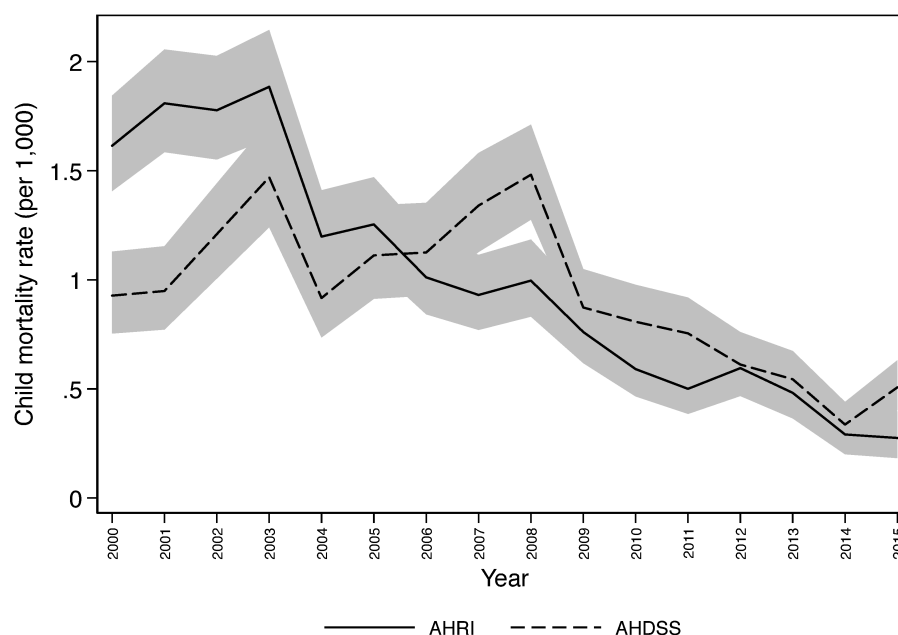

**Supplemental Figure 2.** Distribution of child causes of death over time, Agincourt Health and Demographic Surveillance System (AHDSS) and Africa Health Research Institute (AHRI), South Africa 2000-2007 and 2008-2015. Child causes of death classified by InterVA-5 based on VA.

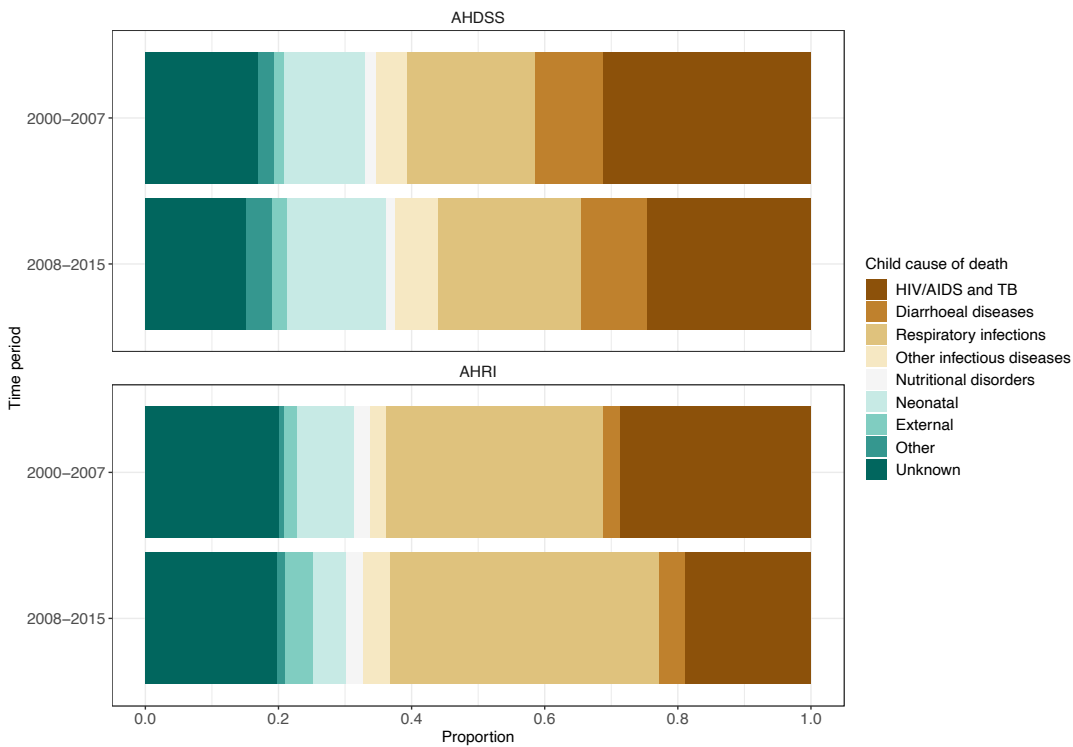

**Supplemental Table 1.** Multilevel relative risk regression of child death on household structure and controls, Agincourt Health and Demographic Surveillance System (AHDSS) and Africa Health Research Institute (AHRI), South Africa 2000-2015 (n=3,637,638 child months).

|                               | RRR   | 95% CI         | p-value |
|-------------------------------|-------|----------------|---------|
| Site                          |       |                |         |
| AHRI                          | 1     | -              |         |
| AHDSS                         | 0.757 | [0.647, 0.887] | 0.001   |
| Time period                   |       |                |         |
| 2000 to 2007                  | 1     | -              |         |
| 2008 to 2015                  | 0.415 | [0.346, 0.498] | <0.001  |
| Site X time period            |       |                |         |
| AHDSS X 2008 to 2015          | 1.454 | [1.251, 1.689] | <0.001  |
| Sex of child                  |       |                |         |
| Female                        | 1     | -              |         |
| Male                          | 1.124 | [1.049, 1.204] | 0.001   |
| Child age (months)            |       |                |         |
| <1                            | 1     | -              |         |
| 1 to 6                        | 0.38  | [0.342, 0.423] | <0.001  |
| 7 to 23                       | 0.177 | [0.159, 0.196] | <0.001  |
| 24 to 59                      | 0.035 | [0.031, 0.039] | <0.001  |
| Multiple birth                |       |                |         |
| Singleton                     | 1     | -              |         |
| Multiple birth                | 1.818 | [1.557, 2.124] | <0.001  |
| Mother's age at birth (years) |       |                |         |
| 15-19                         | 0.864 | [0.780, 0.956] | 0.005   |
| 20-24                         | 1     | -              |         |
| 25-29                         | 1.264 | [1.148, 1.392] | <0.001  |
| 30-34                         | 1.089 | [0.969, 1.225] | 0.152   |
| 35+                           | 1.237 | [1.091, 1.403] | 0.001   |
| Number ages 0-5               |       |                |         |
| 0                             | 1     | -              |         |
| 1                             | 1.098 | [1.011, 1.192] | 0.027   |
| 2+                            | 1.251 | [1.138, 1.376] | <0.001  |
| Number ages 5-19              |       |                |         |
| 0                             | 1     | -              |         |
| 1 to 2                        | 0.98  | [0.849, 1.132] | 0.787   |
| 3 to 4                        | 0.928 | [0.800, 1.076] | 0.321   |
| 5+                            | 1.044 | [0.894, 1.219] | 0.588   |
| Number ages 20+               |       |                |         |
| 0 to 2                        | 1     | -              |         |
| 3 to 4                        | 0.975 | [0.879, 1.081] | 0.631   |
| 5+                            | 0.938 | [0.841, 1.046] | 0.249   |

|                                        |           |                |        |
|----------------------------------------|-----------|----------------|--------|
| Household structure                    |           |                |        |
| Nuclear                                | 1         | -              |        |
| Vertical only                          | 1.644     | [1.325, 2.041] | <0.001 |
| Horizontal/vertical                    | 1.635     | [1.408, 1.898] | <0.001 |
| No parents, kin present                | 2.906     | [2.169, 3.895] | <0.001 |
| Mother only                            | 1.554     | [1.313, 1.839] | <0.001 |
| Other                                  | 1.809     | [1.411, 2.319] | <0.001 |
| Site X household structure             |           |                |        |
| AHDSS X Vertical only                  | 1.181     | [0.892, 1.563] | 0.245  |
| AHDSS X Horizontal/vertical            | 1.07      | [0.877, 1.305] | 0.506  |
| AHDSS X No parents, kin present        | 0.938     | [0.595, 1.479] | 0.784  |
| AHDSS X Mother only                    | 1.373     | [1.112, 1.696] | 0.003  |
| AHDSS X Other                          | 1.932     | [1.339, 2.787] | <0.001 |
| Time period X household structure      |           |                |        |
| 2008 to 2015 X Vertical only           | 0.842     | [0.632, 1.122] | 0.241  |
| 2008 to 2015 X Horizontal/vertical     | 0.905     | [0.742, 1.104] | 0.324  |
| 2008 to 2015 X No parents, kin present | 0.818     | [0.506, 1.323] | 0.413  |
| 2008 to 2015 X Mother only             | 1.2       | [0.973, 1.479] | 0.089  |
| 2008 to 2015 X Other                   | 1.07      | [0.725, 1.578] | 0.734  |
|                                        | Parameter |                |        |
| $\sigma_{mother}^2$                    | 3.152     | [2.574, 3.859] |        |

**Supplemental Table 2.** Multilevel relative risk regression of child death on kin presence and controls, Agincourt Health and Demographic Surveillance System (AHDSS) and Africa Health Research Institute (AHRI), South Africa 2000-2015 (n=3,637,638 child months).

|                               | RRR   | 95% CI         | p-value |
|-------------------------------|-------|----------------|---------|
| Site                          |       |                |         |
| AHRI                          | 1     | -              |         |
| AHDSS                         | 0.874 | [0.794, 0.961] | 0.006   |
| Time period                   |       |                |         |
| 2000 to 2007                  | 1     | -              |         |
| 2008 to 2015                  | 0.456 | [0.399, 0.520] | <0.001  |
| Site X time period            |       |                |         |
| AHDSS X 2008 to 2015          | 1.437 | [1.241, 1.664] | <0.001  |
| Sex of child                  |       |                |         |
| Female                        | 1     | -              |         |
| Male                          | 1.125 | [1.050, 1.205] | 0.001   |
| Child age (months)            |       |                |         |
| <1                            | 1     | -              |         |
| 1 to 6                        | 0.379 | [0.341, 0.422] | <0.001  |
| 7 to 23                       | 0.176 | [0.159, 0.195] | <0.001  |
| 24 to 59                      | 0.035 | [0.031, 0.039] | <0.001  |
| Multiple birth                |       |                |         |
| Singleton                     | 1     | -              |         |
| Multiple birth                | 1.804 | [1.545, 2.106] | <0.001  |
| Mother's age at birth (years) |       |                |         |
| 15-19                         | 0.866 | [0.780, 0.961] | 0.007   |
| 20-24                         | 1     | -              |         |
| 25-29                         | 1.277 | [1.155, 1.413] | <0.001  |
| 30-34                         | 1.127 | [0.995, 1.278] | 0.06    |
| 35+                           | 1.309 | [1.143, 1.499] | <0.001  |
| Number ages 0-5               |       |                |         |
| 0                             | 1     | -              |         |
| 1                             | 1.096 | [1.009, 1.190] | 0.029   |
| 2+                            | 1.249 | [1.136, 1.373] | <0.001  |
| Number ages 5-19              |       |                |         |
| 0                             | 1     | -              |         |
| 1 to 2                        | 1.069 | [0.917, 1.246] | 0.395   |
| 3 to 4                        | 1.014 | [0.864, 1.189] | 0.865   |
| 5+                            | 1.147 | [0.969, 1.357] | 0.11    |
| Number ages 20+               |       |                |         |
| 0 to 2                        | 1     | -              |         |
| 3 to 4                        | 0.953 | [0.861, 1.056] | 0.359   |
| 5+                            | 0.903 | [0.811, 1.004] | 0.06    |
| Parental presence             |       |                |         |

|                                            |           |                |        |
|--------------------------------------------|-----------|----------------|--------|
| Both parents                               | 1         | -              |        |
| One parent                                 | 1.569     | [1.363, 1.807] | <0.001 |
| Neither parent                             | 2.623     | [2.058, 3.343] | <0.001 |
| Related adult presence                     |           |                |        |
| No                                         | 1         | -              |        |
| Yes                                        | 2.954     | [1.769, 4.931] | <0.001 |
| Parental presence X related adult presence |           |                |        |
| One parent X related adult present         | 0.316     | [0.188, 0.530] | <0.001 |
| Neither parent X related adult present     | 0.307     | [0.171, 0.551] | <0.001 |
| Related siblings                           |           |                |        |
| No                                         | 1         | -              |        |
| Yes                                        | 0.712     | [0.606, 0.837] | <0.001 |
| Parental presence X related siblings       |           |                |        |
| One parent X related siblings present      | 1.464     | [1.233, 1.737] | <0.001 |
| Neither parent X related siblings present  | 1.518     | [1.070, 2.153] | 0.019  |
| Time period X related adult presence       |           |                |        |
| 2008 to 2015 X related adult presence      | 0.806     | [0.698, 0.932] | 0.004  |
|                                            | Parameter |                |        |
| $\sigma^2_{mother}$                        | 1.128     | [0.944, 1.349] |        |

**Supplemental Table 3.** Multilevel relative risk regression of child death on household structure and controls, Agincourt Health and Demographic Surveillance System (AHDSS) and Africa Health Research Institute (AHRI), South Africa 2000-2015 (n=3,637,638 child months). Estimation sample restricted to those with household SES information.

|                               | RRR   | 95% CI         | p-value |
|-------------------------------|-------|----------------|---------|
| Site                          |       |                |         |
| AHRI                          | 1     | -              |         |
| AHDSS                         | 0.772 | [0.625, 0.954] | 0.017   |
| Time period                   |       |                |         |
| 2000 to 2007                  | 1     | -              |         |
| 2008 to 2015                  | 0.391 | [0.305, 0.501] | <0.001  |
| Site X time period            |       |                |         |
| AHDSS X 2008 to 2015          | 1.395 | [1.141, 1.705] | 0.001   |
| Sex of child                  |       |                |         |
| Female                        | 1     | -              |         |
| Male                          | 1.134 | [1.037, 1.240] | 0.006   |
| Child age (months)            |       |                |         |
| <1                            | 1     | -              |         |
| 1 to 6                        | 0.355 | [0.304, 0.415] | <0.001  |
| 7 to 23                       | 0.176 | [0.152, 0.205] | <0.001  |
| 24 to 59                      | 0.036 | [0.030, 0.042] | <0.001  |
| Multiple birth                |       |                |         |
| Singleton                     | 1     | -              |         |
| Multiple birth                | 1.58  | [1.281, 1.948] | <0.001  |
| Mother's age at birth (years) |       |                |         |
| 15-19                         | 0.897 | [0.785, 1.024] | 0.107   |
| 20-24                         | 1     | -              |         |
| 25-29                         | 1.364 | [1.202, 1.548] | <0.001  |
| 30-34                         | 1.175 | [1.008, 1.368] | 0.039   |
| 35+                           | 1.391 | [1.183, 1.634] | <0.001  |
| Number ages 0-5               |       |                |         |
| 0                             | 1     | -              |         |
| 1                             | 1.049 | [0.943, 1.167] | 0.375   |
| 2+                            | 1.225 | [1.082, 1.387] | 0.001   |
| Number ages 5-19              |       |                |         |
| 0                             | 1     | -              |         |
| 1 to 2                        | 1.031 | [0.855, 1.243] | 0.746   |
| 3 to 4                        | 0.949 | [0.782, 1.152] | 0.594   |
| 5+                            | 1.034 | [0.843, 1.268] | 0.748   |
| Number ages 20+               |       |                |         |
| 0 to 2                        | 1     | -              |         |
| 3 to 4                        | 0.912 | [0.798, 1.041] | 0.174   |
| 5+                            | 0.868 | [0.753, 1.002] | 0.053   |

|                                        |       |                |        |
|----------------------------------------|-------|----------------|--------|
| Household structure                    |       |                |        |
| Nuclear                                | 1     | -              |        |
| Vertical only                          | 1.851 | [1.374, 2.495] | <0.001 |
| Horizontal/vertical                    | 1.733 | [1.408, 2.131] | <0.001 |
| No parents, kin present                | 3.356 | [2.292, 4.914] | <0.001 |
| Mother only                            | 1.716 | [1.357, 2.170] | <0.001 |
| Other                                  | 1.892 | [1.335, 2.680] | <0.001 |
| Site X household structure             |       |                |        |
| AHDSS X Vertical only                  | 1.099 | [0.752, 1.604] | 0.627  |
| AHDSS X Horizontal/vertical            | 1.127 | [0.863, 1.470] | 0.38   |
| AHDSS X No parents, kin present        | 1.072 | [0.619, 1.857] | 0.804  |
| AHDSS X Mother only                    | 1.309 | [0.981, 1.746] | 0.067  |
| AHDSS X Other                          | 2.069 | [1.274, 3.360] | 0.003  |
| Time period X household structure      |       |                |        |
| 2008 to 2015 X Vertical only           | 0.734 | [0.502, 1.075] | 0.112  |
| 2008 to 2015 X Horizontal/vertical     | 0.838 | [0.648, 1.085] | 0.181  |
| 2008 to 2015 X No parents, kin present | 0.763 | [0.416, 1.399] | 0.382  |
| 2008 to 2015 X Mother only             | 1.278 | [0.978, 1.669] | 0.073  |
| 2008 to 2015 X Other                   | 1.044 | [0.624, 1.745] | 0.87   |
| Household SES                          |       |                |        |
| Low                                    | 1     | -              |        |
| Middle                                 | 0.949 | [0.852, 1.058] | 0.346  |
| High                                   | 0.788 | [0.702, 0.883] | <0.001 |
| Household head gender                  |       |                |        |
| Female                                 | 1     | -              |        |
| Male                                   | 1.104 | [0.999, 1.220] | 0.052  |
| Parameter                              |       |                |        |
| $\sigma_{mother}^2$                    | 3.152 | [2.574, 3.859] |        |



**Supplemental Table 4.** Multilevel relative risk regression of child death on kin presence and controls, Agincourt Health and Demographic Surveillance System (AHDSS) and Africa Health Research Institute (AHRI), South Africa 2000-2015 (n=2,468,466 child months). Estimation sample restricted to those with household SES information.

|                               | RRR   | 95% CI         | p-value |
|-------------------------------|-------|----------------|---------|
| Site                          |       |                |         |
| AHRI                          | 1     | -              |         |
| AHDSS                         | 0.903 | [0.797, 1.022] | 0.106   |
| Time period                   |       |                |         |
| 2000 to 2007                  | 1     | -              |         |
| 2008 to 2015                  | 0.442 | [0.367, 0.532] | <0.001  |
| Site X time period            |       |                |         |
| AHDSS X 2008 to 2015          | 1.374 | [1.129, 1.672] | 0.002   |
| Sex of child                  |       |                |         |
| Female                        | 1     | -              |         |
| Male                          | 1.136 | [1.039, 1.242] | 0.005   |
| Child age (months)            |       |                |         |
| <1                            | 1     | -              |         |
| 1 to 6                        | 0.354 | [0.303, 0.414] | <0.001  |
| 7 to 23                       | 0.176 | [0.152, 0.204] | <0.001  |
| 24 to 59                      | 0.036 | [0.030, 0.042] | <0.001  |
| Multiple birth                |       |                |         |
| Singleton                     | 1     | -              |         |
| Multiple birth                | 1.571 | [1.275, 1.936] | <0.001  |
| Mother's age at birth (years) |       |                |         |
| 15-19                         | 0.889 | [0.775, 1.019] | 0.091   |
| 20-24                         | 1     | -              |         |
| 25-29                         | 1.4   | [1.227, 1.597] | <0.001  |
| 30-34                         | 1.246 | [1.059, 1.466] | 0.008   |
| 35+                           | 1.523 | [1.280, 1.812] | <0.001  |
| Number ages 0-5               |       |                |         |
| 0                             | 1     | -              |         |
| 1                             | 1.046 | [0.941, 1.163] | 0.406   |
| 2+                            | 1.219 | [1.077, 1.380] | 0.002   |
| Number ages 5-19              |       |                |         |
| 0                             | 1     | -              |         |
| 1 to 2                        | 1.19  | [0.974, 1.454] | 0.089   |
| 3 to 4                        | 1.103 | [0.894, 1.360] | 0.36    |
| 5+                            | 1.212 | [0.971, 1.513] | 0.089   |
| Number ages 20+               |       |                |         |
| 0 to 2                        | 1     | -              |         |
| 3 to 4                        | 0.89  | [0.780, 1.015] | 0.081   |
| 5+                            | 0.827 | [0.719, 0.951] | 0.008   |

|                                            |           |                |        |
|--------------------------------------------|-----------|----------------|--------|
| Parental presence                          |           |                |        |
| Both parents                               | 1         | -              |        |
| One parent                                 | 1.609     | [1.341, 1.930] | <0.001 |
| Neither parent                             | 2.865     | [2.086, 3.933] | <0.001 |
| Related adult presence                     |           |                |        |
| No                                         | 1         | -              |        |
| Yes                                        | 4.031     | [2.137, 7.604] | <0.001 |
| Parental presence X related adult presence |           |                |        |
| One parent X related adult present         | 0.228     | [0.120, 0.432] | <0.001 |
| Neither parent X related adult present     | 0.229     | [0.110, 0.474] | <0.001 |
| Related siblings                           |           |                |        |
| No                                         | 1         | -              |        |
| Yes                                        | 0.6       | [0.487, 0.739] | <0.001 |
| Parental presence X related siblings       |           |                |        |
| One parent X related siblings present      | 1.695     | [1.360, 2.113] | <0.001 |
| Neither parent X related siblings present  | 1.84      | [1.185, 2.856] | 0.007  |
| Time period X related adult presence       |           |                |        |
| 2008 to 2015 X related adult presence      | 0.722     | [0.599, 0.871] | 0.001  |
| Household SES                              |           |                |        |
| Low                                        | 1         | -              |        |
| Middle                                     | 0.946     | [0.849, 1.054] | 0.314  |
| High                                       | 0.784     | [0.699, 0.879] | <0.001 |
| Household head gender                      |           |                |        |
| Female                                     | 1         | -              |        |
| Male                                       | 1.107     | [1.004, 1.221] | 0.042  |
|                                            | Parameter |                |        |
| $\sigma^2_{mother}$                        | 3.375     | [2.494, 4.568] |        |
